# Supplementary material for: Physiological and metabolic insights into the first cultured anaerobic representative of deep-sea Planctomycetes bacteria
Source: eLife. 2024 Jan 24;12:RP89874. doi: 10.7554/eLife.89874 (PMC10945688; doi:10.7554/eLife.89874)
Supplement: Supplementary file 1. [file elife-89874-supp1.xlsx]

## Sheet: Sheet1
Supplementary file 1. Phenotypic and genotypic features of strain ZRK32 and the most closely related type strain Poriferisphaera corsica KS4T.
Feature	ZRK32	KS4T
Phenotypic features
Cell morphology	spherical	spherical
Cell diameter (µm)	0.4-1.0	0.63 ± 0.21
Temperature range for growth (°C)	4-32	15-30
Optimum	28	27
pH for growth	6.0-8.0	6.5-8.0
Optimum	7	7.5
NaCl concentration range for growth (%)	0-5	0-4
Isolation source	Deep-sea cold seep sediment	Coast of the island Corsica
Genomic features
Gene Bank ID	CP066225	CP036425
Genome size (bp)	5234020	4291168
G+C content (mol%)	46.28	48.7
No.scaffolds/contigs	1	1
No. of genes	4175	3714
No. of rRNAs	6	3
No. of tRNAs	45	45
No. of protein-coding genes	4121	3659
Completeness (%)	100	94.83
ANIb (%)	100	72.89
ANIm (%)	100	85.34
Tetra	1	0.97385
isDDH (%)	100	20.9
