# Supplementary material for: Physiological and metabolic insights into the first cultured anaerobic representative of deep-sea Planctomycetes bacteria
Source: eLife. 2024 Jan 24;12:RP89874. doi: 10.7554/eLife.89874 (PMC10945688; doi:10.7554/eLife.89874)
Supplement: Supplementary file 2. [file elife-89874-supp2.xlsx]

## Sheet: Sheet1
Supplementary file 2. The sugar utilization of strain ZRK32. +, Positive result or growth; −, negative result or no growth.
Sugar species	Utilization
Glucose	+
Maltose	+
Fructose	+
Sucrose	-
Starch	-
Isomaltose	+
Trehalose	-
Galactose	+
Cellulose	-
Xylose	-
D-mannose	+
Rhamnose	+
