# Supplementary material for: Physiological and metabolic insights into the first cultured anaerobic representative of deep-sea Planctomycetes bacteria
Source: eLife. 2024 Jan 24;12:RP89874. doi: 10.7554/eLife.89874 (PMC10945688; doi:10.7554/eLife.89874)
Supplement: Supplementary file 3. — The DNGNGWU marker genes in phylosift refer to a suite of single-copy, protein-coding marker genes. All 37 DNGNGWU marker genes were concatenated to construct maximum likelihood phylogenetic tree. [file elife-89874-supp3.xlsx]

## Sheet: Sheet1
Supplementary file 3. Marker genes used in the phylogenetic analysis.The DNGNGWU marker genes in phylosift refer to a suite of single-copy, protein- coding marker genes. All 37 DNGNGWU marker genes were concatenated to construct maximum likelihood phylogenetic tree.
ID	Protein
DNGNGWU00001	ribosomal protein S2 rpsB
DNGNGWU00002	ribosomal protein S10 rpsJ
DNGNGWU00003	ribosomal protein L1 rplA
DNGNGWU00005	translation initiation factor IF-2
DNGNGWU00006	metalloendopeptidase
DNGNGWU00007	ribosomal protein L22
DNGNGWU00009	ribosomal protein L4/L1e rplD
DNGNGWU00010	ribosomal protein L2 rplB
DNGNGWU00011	ribosomal protein S9 rpsI
DNGNGWU00012	ribosomal protein L3 rplC
DNGNGWU00013	phenylalanyl-tRNA synthetase beta subunit
DNGNGWU00014	ribosomal protein L14b/L23e rplN
DNGNGWU00015	ribosomal protein S5
DNGNGWU00016	ribosomal protein S19 rpsS
DNGNGWU00017	ribosomal protein S7
DNGNGWU00018	ribosomal protein L16/L10E rplP
DNGNGWU00019	ribosomal protein S13 rpsM
DNGNGWU00020	phenylalanyl-tRNA synthetase alpha subunit
DNGNGWU00021	ribosomal protein L15
DNGNGWU00022	ribosomal protein L25/L23
DNGNGWU00023	ribosomal protein L6 rplF
DNGNGWU00024	ribosomal protein L11 rplK
DNGNGWU00025	ribosomal protein L5 rplE
DNGNGWU00026	ribosomal protein S12/S23
DNGNGWU00027	ribosomal protein L29
DNGNGWU00028	ribosomal protein S3 rpsC
DNGNGWU00029	ribosomal protein S11 rpsK
DNGNGWU00030	ribosomal protein L10
DNGNGWU00031	ribosomal protein S8
DNGNGWU00032	tRNA pseudouridine synthase B
DNGNGWU00033	ribosomal protein L18P/L5E
DNGNGWU00034	ribosomal protein S15P/S13e
DNGNGWU00035	Porphobilinogen deaminase
DNGNGWU00036	ribosomal protein S17
DNGNGWU00037	ribosomal protein L13 rplM
DNGNGWU00039	ribonuclease HII
DNGNGWU00040	ribosomal protein L24
