# Supplementary material for: Physiological and metabolic insights into the first cultured anaerobic representative of deep-sea Planctomycetes bacteria
Source: eLife. 2024 Jan 24;12:RP89874. doi: 10.7554/eLife.89874 (PMC10945688; doi:10.7554/eLife.89874)
Supplement: Supplementary file 4. [file elife-89874-supp4.xlsx]

## Sheet: Sheet1
Supplementary file 4. Primers used for qRT-PCR.
Primer name	Nucleotide Sequence (5’-3’)
16S-F	CCCTTCCTTTGGGTCTGGTC
16S-R	TTCCGCAATGCACGAAAGTG
JD969_02150-F	TACTGCTGAAGGCTTCCGTG
JD969_02150-R	ACGAGTTTGCTCGTCCAGAG
JD969_01715-F	CCAACTGCTGTACCACCGAT
JD969_01715-R	TGTTTGCTGGTTATGCACGC
JD969_05505-F	ATCAGCGAAGAACGCCTCAA
JD969_05505-R	TTCAGCCATCTGGACGGAAC
JD969_03155-F	TCCGCTACTTTGATGGCGTT
JD969_03155-R	TCGATGCCTGCGTAGATGTC
JD969_11015-F	GTTTGGCGAAGGCGTTTGAT
JD969_11015-R	TCCAGACCAACACTCAAGCC
JD969_15065-F	AGCGGAAGACACCTTTACGG
JD969_15065-R	GCACACAACTTGCCGATGTT
JD969_20470-F	GGGTGTCCATCGAAACGGAT
JD969_20470-R	CATCGAAGAAGACCCCGCAT
JD969_02395-F	AAGGAAGCCGGTACATGTGG
JD969_02395-R	GCCCAACCATCGTCAACAAC
JD969_01535-F	CTCACCGCTGGTTCAGTCAT
JD969_01535-R	AGCCGAAGAACATGAGCCAA
JD969_01545-F	TGCTCTGGGTTATCGCTGTC
JD969_01545-R	GTGAGCGACGGAGGAGTATG
JD969_17055-F	CGTCATCGTGTACTGGCAGA
JD969_17055-R	ACGTCGCTCACCAATAGCTC
JD969_17065-F	TTCAGCCTAAACAGGCGGTC
JD969_17065-R	GCATGCGATTCACTTGCTCA
JD969_17075-F	CCGCAGGCTTATGTTCGTCT
JD969_17075-R	GAGCCAAAGCCAATTCGTCG
JD969_17125-F	CACTCGCTGATCGTCTCGAA
JD969_17125-R	AACGCGAGGGTTATCACCAG
JD969_17130-F	CAGTTACGAACGTGCCAACG
JD969_17130-R	TCTGCAGTGTAAACGCGACT
JD969_01920-F	GGTAGACGCGTGGATCGTAG
JD969_01920-R	CACCGACACTCAGTACGCAT
JD969_01180-F	ATCGCTGGCATACTTGCTCA
JD969_01180-R	GGGTCACGTTCAGCACAAAC
JD969_07640-F	GCCGTCGGAGATATCGTTGT
JD969_07640-R	GGGTGGCGACAAAATCGTTC
JD969_00040-F	ACAGCGATACCGCTAACTCG
JD969_00040-R	CCTGAACGGTGTGAGAGGAC
JD969_18895-F	CCCACATTGGGAAACGCTTG
JD969_18895-R	ATTCGAACGTGCAGGCCTTA
JD969_10150-F	CAGCACACTCAACAACCTGC
JD969_10150-R	CGATGGCTTGGGGTTTTTCG
JD969_02410-F	ATACGCAATGTCGTGTGGGT
JD969_02410-R	TGCGAAACGACGCCTTATCT
JD969_01510-F	CAGCTCGCTACGATCGACAT
JD969_01510-R	AAGAGTGCGAGTACGAAGGC
JD969_15425-F	TCTTCGAGGCACCAGTCAAC
JD969_15425-R	CCGTGTTACGATATCCGGGG
JD969_04170-F	TGCTCACGCAACATCTCAGT
JD969_04170-R	TGATGCTTGGTCAGCCGATT
JD969_05490-F	GGTTTGCTGAATCATCCGCC
JD969_05490-R	CATTGCACGAAGTCAGCACC
JD969_10725-F	GTGTGGTATCCCGGCTTTGA
JD969_10725-R	TTCCTGGTGGCCGAATTGTT
JD969_16585-F	GAGTTAGATCCGGGTGCGAG
JD969_16585-R	AATCAGGCGGCCATTCTCAA
JD969_04980-F	CTCCAGGACGCACTCGATAC
JD969_04980-R	GACTGCGTTCATGAGTGGGA
JD969_09950-F	CTTGCACCGGGTATCACCTT
JD969_09950-R	CTTGCACCGGGTATCACCTT
JD969_09955-F	GTACCGGAAGAGCGTGTGAA
JD969_09955-R	TCAGACTGACAGAACGGCAC
